# Supplementary material for: Could resistance to lactate accumulation contribute to the better swimming performance of Brycon amazonicus when compared to Colossoma macropomum?
Source: PeerJ. 2018 Oct 10;6:e5719. doi: 10.7717/peerj.5719 (PMC6186156; doi:10.7717/peerj.5719)
Supplement: Data S1 [file peerj-06-5719-s001.xlsx]

## Sheet: Swimming
Velocity	MO2 Mat	Mo2 Tamb	Lact Mat	Lac Mat	Nox Tamb	NOX Mat		Velocity	MO2 Mat	Mo2 Tamb	Lact Mat	Lac Mat	Nox Tamb	NOX Mat
0.1	12.014	7.5937	5.7528	7.0523	94.1266	47.921		fatigue			10.5863	21.2303	127.95	394.392
0.1	13.4893	9.7955	7.3247	6.7517	54.062	157.1		fatigue			8.4004	11.616	283.552	448.424
0.1	14.2784	9.0829	6.9769	6.3714	126.853	96.4483		fatigue			11.6703	13.6167	277.265	342.399
0.1	10.5518	10.147	6.2911	4.8453	97.9555	223.741		fatigue			8.5531	14.4534	307.524	349.645
0.1	12.218	10.5407	6.0908	5.7857	109.162	23.2329		fatigue			3.8475	17.8349	245.091	267.246
0.1	11.9175	11.8764	7.5888	7.5676	54.0966	129.615		fatigue			12.5944	11.5367	212.633	273.825
1.25	13.7465	1.9304	2.9132	8.4461	206.19	197.433		Rec 15	15.3929	10.7072
1.25	13.3239	4.5211	3.7977	5.5171	81.1767	180.999		Rec 15	15.6359	7.392
1.25	14.583	1.9675	3.8257	5.5904	183.335	157.887		Rec 15	15.6019	9.7384
1.25	15.2749	4.0568	6.507	6.2229	192.258	112.638		Rec 15	17.8446	12.3187
1.25	12.4342	0.4703	4.5342	8.3085	110.587	145.597		Rec 15	14.2166	10.2467
1.25	12.4787	1.1527	2.7691	3.5441	168.705	134.743		Rec 15	20.0919	10.8405
2.5	12.8497	15.3359	9.9003	9.0762	215.805	91.4208		Rec 30	11.9027	8.5925
2.5	15.371	12.9086	7.0878	9.0636	111.372	239.94		Rec 30	11.8687	9.0173
2.5	17.4211	11.4694	3.517	9.1756	245.469	206.655		Rec 30	11.5596	9.2916
2.5	12.2354	17.0438	6.9686	7.0144	131.451	138.399		Rec 30	8.5438	9.389
2.5	11.5648	12.0671	9.2399	5.5548	79.1728	200.516		Rec 30	11.5265	8.3741
2.5	12.9261	17.4909	12.5279	8.7861	138.333	269.258		Rec 30	12.7465	9.6077
3.75	13.8111			9.6834		102.771		Rec 45	11.882	6.2714
3.75	17.9983			9.9302		204.865		Rec 45	12.2929	8.8718
3.75	17.7714			10.7194		387.088		Rec 45	12.51	12.6068
3.75	20.5503			10.9948		177.158		Rec 45	13.763	9.2503
3.75	17.75			5.5796		340.264		Rec 45	13.2118	10.5903
3.75	20.2149			7.7036		485.548		Rec 45	11.9339	9.6304
5	18.8235			12.256		250.902		Rec 60	10.564	11.4645	8.212	6.0556	108.374	187.759
5	14.3427			10.348		242.332		Rec 60	10.8904	10.9124	4.6853	5.7404	90.9272	135.061
5	19.9888			5.8624		287.782		Rec 60	12.8575	10.8456	2.4515	5.5235	193.14	84.3542
5	17.4561			13.3903		230.471		Rec 60	9.0917	10.0464	5.4318	3.9521	143.321	130.336
5	20.8771			13.0876		155.342		Rec 60	11.82	12.2693	4.4856	5.7783	111.341	166.555
5	19.7076			13.4377		178.611		Rec 60	12.8901	9.7071	5.1193	7.5444	163.366	175.005

## Sheet: LDH fatigued
White Muscle	Tambaqui	Control	91.2141		White Muscle	Tambaqui	Fatigued	41.5448
White Muscle	Tambaqui	Control	174.13		White Muscle	Tambaqui	Fatigued	103.309
White Muscle	Tambaqui	Control	31.7212		White Muscle	Tambaqui	Fatigued	103.927
White Muscle	Tambaqui	Control	120.386		White Muscle	Tambaqui	Fatigued	130.601
White Muscle	Tambaqui	Control	120.149		White Muscle	Tambaqui	Fatigued	126.736
White Muscle	Tambaqui	Control	192.886		White Muscle	Tambaqui	Fatigued	153.796
Red muscle	Tambaqui	Control	91.9279		Red muscle	Tambaqui	Fatigued	81.4931
Red muscle	Tambaqui	Control	79.3276		Red muscle	Tambaqui	Fatigued	75.9365
Red muscle	Tambaqui	Control	86.1698		Red muscle	Tambaqui	Fatigued	83.708
Red muscle	Tambaqui	Control	85.455		Red muscle	Tambaqui	Fatigued	73.8181
Red muscle	Tambaqui	Control	86.8245		Red muscle	Tambaqui	Fatigued	75.2274
Red muscle	Tambaqui	Control	103.211		Red muscle	Tambaqui	Fatigued	119.543
White Muscle	Matrinchã	Control	186.51		White Muscle	Matrinchã	Fatigued	198.617
White Muscle	Matrinchã	Control	149.388		White Muscle	Matrinchã	Fatigued	187.805
White Muscle	Matrinchã	Control	252.296		White Muscle	Matrinchã	Fatigued	195.292
White Muscle	Matrinchã	Control	219.453		White Muscle	Matrinchã	Fatigued	197.207
White Muscle	Matrinchã	Control	99.2057		White Muscle	Matrinchã	Fatigued	188.426
White Muscle	Matrinchã	Control	172.67		White Muscle	Matrinchã	Fatigued	194.575
Red muscle	Matrinchã	Control	268.926		Red muscle	Matrinchã	Fatigued	212.625
Red muscle	Matrinchã	Control	221.201		Red muscle	Matrinchã	Fatigued	231.841
Red muscle	Matrinchã	Control	302.539		Red muscle	Matrinchã	Fatigued	201.408
Red muscle	Matrinchã	Control	179.494		Red muscle	Matrinchã	Fatigued	157.117
Red muscle	Matrinchã	Control	220.17		Red muscle	Matrinchã	Fatigued	166.666
Red muscle	Matrinchã	Control	143.241		Red muscle	Matrinchã	Fatigued	160.997

## Sheet: Hypoxia Lact
White Muscle	Tambaqui	Control	10.3945
White Muscle	Tambaqui	Control	9.1688
White Muscle	Tambaqui	Control	9.167
White Muscle	Tambaqui	Control	9.191
White Muscle	Tambaqui	Control	6.1473
White Muscle	Tambaqui	Control	5.5699
Red muscle	Tambaqui	Control	6.5166
Red muscle	Tambaqui	Control	5.867
Red muscle	Tambaqui	Control	6.7778
Red muscle	Tambaqui	Control	6.2541
Red muscle	Tambaqui	Control	8.4785
Red muscle	Tambaqui	Control	3.4772
White Muscle	Matrinchã	Control	9.2577
White Muscle	Matrinchã	Control	9.4704
White Muscle	Matrinchã	Control	7.7767
White Muscle	Matrinchã	Control	8.1303
White Muscle	Matrinchã	Control	8.9647
White Muscle	Matrinchã	Control	11.2428
Red muscle	Matrinchã	Control	9.0481
Red muscle	Matrinchã	Control	10.3066
Red muscle	Matrinchã	Control	9.7272
Red muscle	Matrinchã	Control	13.733
Red muscle	Matrinchã	Control	15.2097
Red muscle	Matrinchã	Control	13.6002
White Muscle	Tambaqui	Hypoxia	7.7936
White Muscle	Tambaqui	Hypoxia	12.3313
White Muscle	Tambaqui	Hypoxia	13.9175
White Muscle	Tambaqui	Hypoxia	21.0305
White Muscle	Tambaqui	Hypoxia	9.7538
White Muscle	Tambaqui	Hypoxia	13.0321
Red muscle	Tambaqui	Hypoxia	7.3425
Red muscle	Tambaqui	Hypoxia	4.967
Red muscle	Tambaqui	Hypoxia	4.2536
Red muscle	Tambaqui	Hypoxia	11.5523
Red muscle	Tambaqui	Hypoxia	8.3177
Red muscle	Tambaqui	Hypoxia	8.7713
White Muscle	Matrinchã	Hypoxia	11.5601
White Muscle	Matrinchã	Hypoxia	12.1861
White Muscle	Matrinchã	Hypoxia	10.9067
White Muscle	Matrinchã	Hypoxia	13.3054
White Muscle	Matrinchã	Hypoxia	11.2619
White Muscle	Matrinchã	Hypoxia	14.4253
Red muscle	Matrinchã	Hypoxia	8.5361
Red muscle	Matrinchã	Hypoxia	10.9245
Red muscle	Matrinchã	Hypoxia	11.6119
Red muscle	Matrinchã	Hypoxia	9.9631
Red muscle	Matrinchã	Hypoxia	4.7462
Red muscle	Matrinchã	Hypoxia	14.8392

## Sheet: Hypoxia LDH
White Muscle	Tambaqui	Control	115.455		White Muscle	Tambaqui	Hypoxia	123.559
White Muscle	Tambaqui	Control	107.584		White Muscle	Tambaqui	Hypoxia	157.201
White Muscle	Tambaqui	Control	93.6072		White Muscle	Tambaqui	Hypoxia	174.918
White Muscle	Tambaqui	Control	120.496		White Muscle	Tambaqui	Hypoxia	160.214
White Muscle	Tambaqui	Control	137.518		White Muscle	Tambaqui	Hypoxia	108.729
White Muscle	Tambaqui	Control	146.446		White Muscle	Tambaqui	Hypoxia	147.25
Red muscle	Tambaqui	Control	103.547		Red muscle	Tambaqui	Hypoxia	68.9556
Red muscle	Tambaqui	Control	84.5637		Red muscle	Tambaqui	Hypoxia	78.3756
Red muscle	Tambaqui	Control	126.477		Red muscle	Tambaqui	Hypoxia	64.3994
Red muscle	Tambaqui	Control	127.579		Red muscle	Tambaqui	Hypoxia	67.6933
Red muscle	Tambaqui	Control	86.5542		Red muscle	Tambaqui	Hypoxia	62.7385
Red muscle	Tambaqui	Control	71.2095		Red muscle	Tambaqui	Hypoxia	58.9349
White Muscle	Matrinchã	Control	253.074		White Muscle	Matrinchã	Hypoxia	279.323
White Muscle	Matrinchã	Control	268.731		White Muscle	Matrinchã	Hypoxia	260.267
White Muscle	Matrinchã	Control	283.313		White Muscle	Matrinchã	Hypoxia	244.075
White Muscle	Matrinchã	Control	283.766		White Muscle	Matrinchã	Hypoxia	188.242
White Muscle	Matrinchã	Control	275.169		White Muscle	Matrinchã	Hypoxia	199.212
White Muscle	Matrinchã	Control	294.663		White Muscle	Matrinchã	Hypoxia	319.764
Red muscle	Matrinchã	Control	290.361		Red muscle	Matrinchã	Hypoxia	233.401
Red muscle	Matrinchã	Control	345.454		Red muscle	Matrinchã	Hypoxia	245.365
Red muscle	Matrinchã	Control	282.37		Red muscle	Matrinchã	Hypoxia	178.014
Red muscle	Matrinchã	Control	267.761		Red muscle	Matrinchã	Hypoxia	234.335
Red muscle	Matrinchã	Control	301.894		Red muscle	Matrinchã	Hypoxia	241.813
Red muscle	Matrinchã	Control	276.803		Red muscle	Matrinchã	Hypoxia	209.492
